# Supplementary material
Source: PubMed Central journal article supplement (PMC8728604)
Supplement: EMBR-23-e53166-s012.pdf [file EMBR-23-e53166-s012.pdf]

## Expanded View Figures

### Figure EV1. G3BP1 engages cGAS in a condensed state.

- A Bright-field microscope images of indicated groups (left) and a quantitative analysis of total area of the condensates.  $n = 3$  biological replicates. 10  $\mu\text{M}$  cGAS, 5  $\mu\text{M}$  G3BP1, 5  $\mu\text{M}$  BSA and 500 nM dsDNA were used in these assays.
- B Coomassie blue staining of purified recombinant cGAS-mCherry protein.
- C Fluorescent images of liquid droplets after mixing 10  $\mu\text{M}$  cGAS-mCherry with 1  $\mu\text{M}$  FAM-labeled dsDNA.
- D Immunofluorescent staining of cGAS in WT and  $c\text{GAS}^{-/-}$  cells. Images were acquired with Leica TCS SP8 Confocal Microscopy.
- E, F Immunoblotting of WT and  $G3BP1^{-/-}$  cells with indicated antibodies.
- G Immunofluorescent staining of cGAS and G3BP1 in both WT and  $G3BP1^{-/-}$  HeLa cells. Images were acquired with Leica TCS SP8 Confocal microscopy. The white arrows indicate the cGAS-G3BP1 condensates.
- H Immunofluorescent staining of cGAS and G3BP1 in both WT and  $G3BP1^{-/-}$  HeLa cells. 3D images were reconstituted by Leica LAS X software.
- I Quantitative analysis of total cGAS puncta number (left) and volume (right) per cell of (H).  $n = 21$  cells.
- J Immunoblotting of fractionated lysates from WT and  $G3BP1^{-/-}$  HeLa cells. GAPDH and Lamin B1 blots were used as controls for cytoplasmic and nuclear fractions, respectively.

Data information: Representative images are shown (A, C–H, and J). Error bars, mean with s.d. (A and I). Scale bars, 10  $\mu\text{m}$  (A), 14  $\mu\text{m}$  (C), 5  $\mu\text{m}$  (D, G and H). WT, wild type; IB, immunoblotting; NS, non-significant. Hoechst (blue), nuclear staining. \* $P < 0.05$ , \*\* $P < 0.01$ , \*\*\* $P < 0.001$ , \*\*\*\* $P < 0.0001$ , two-tailed  $t$ -test. Source data are available online for this figure.

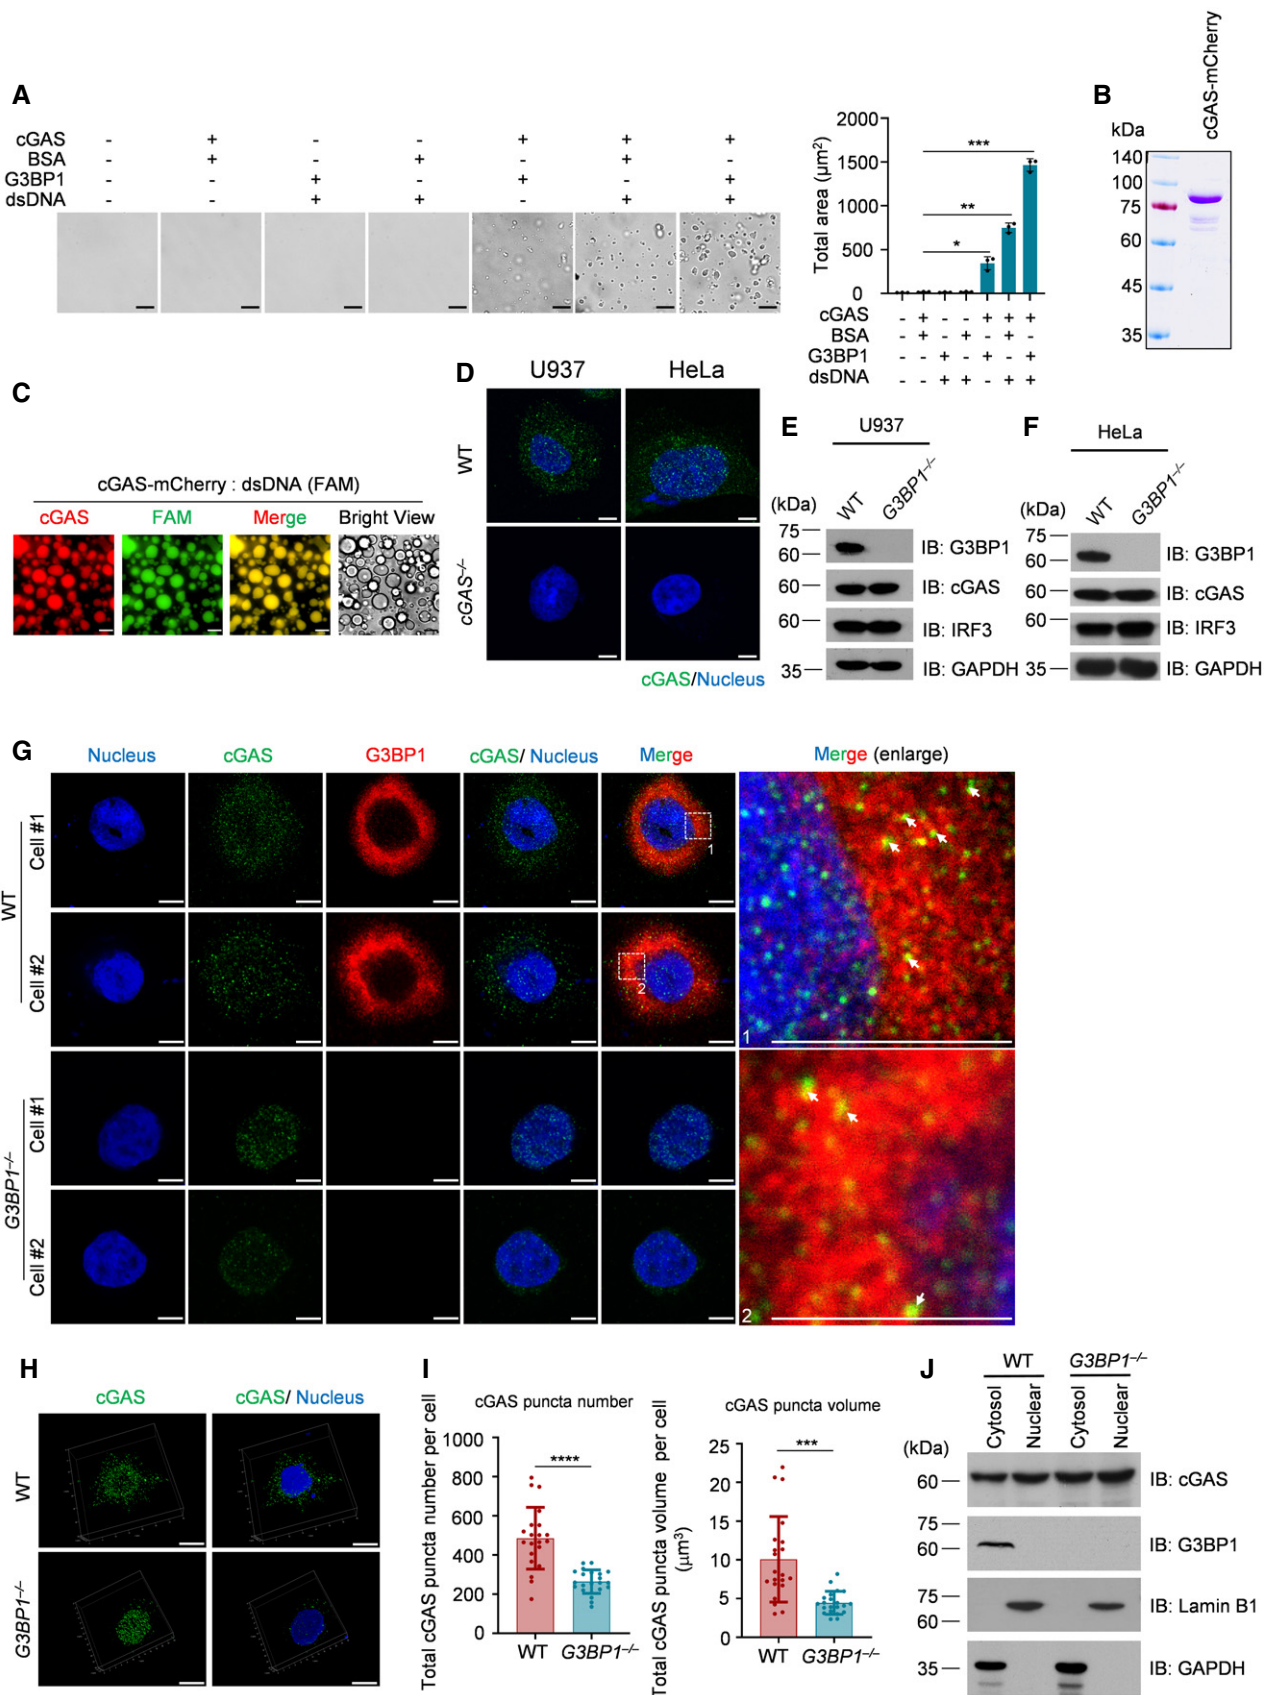

Figure EV1.

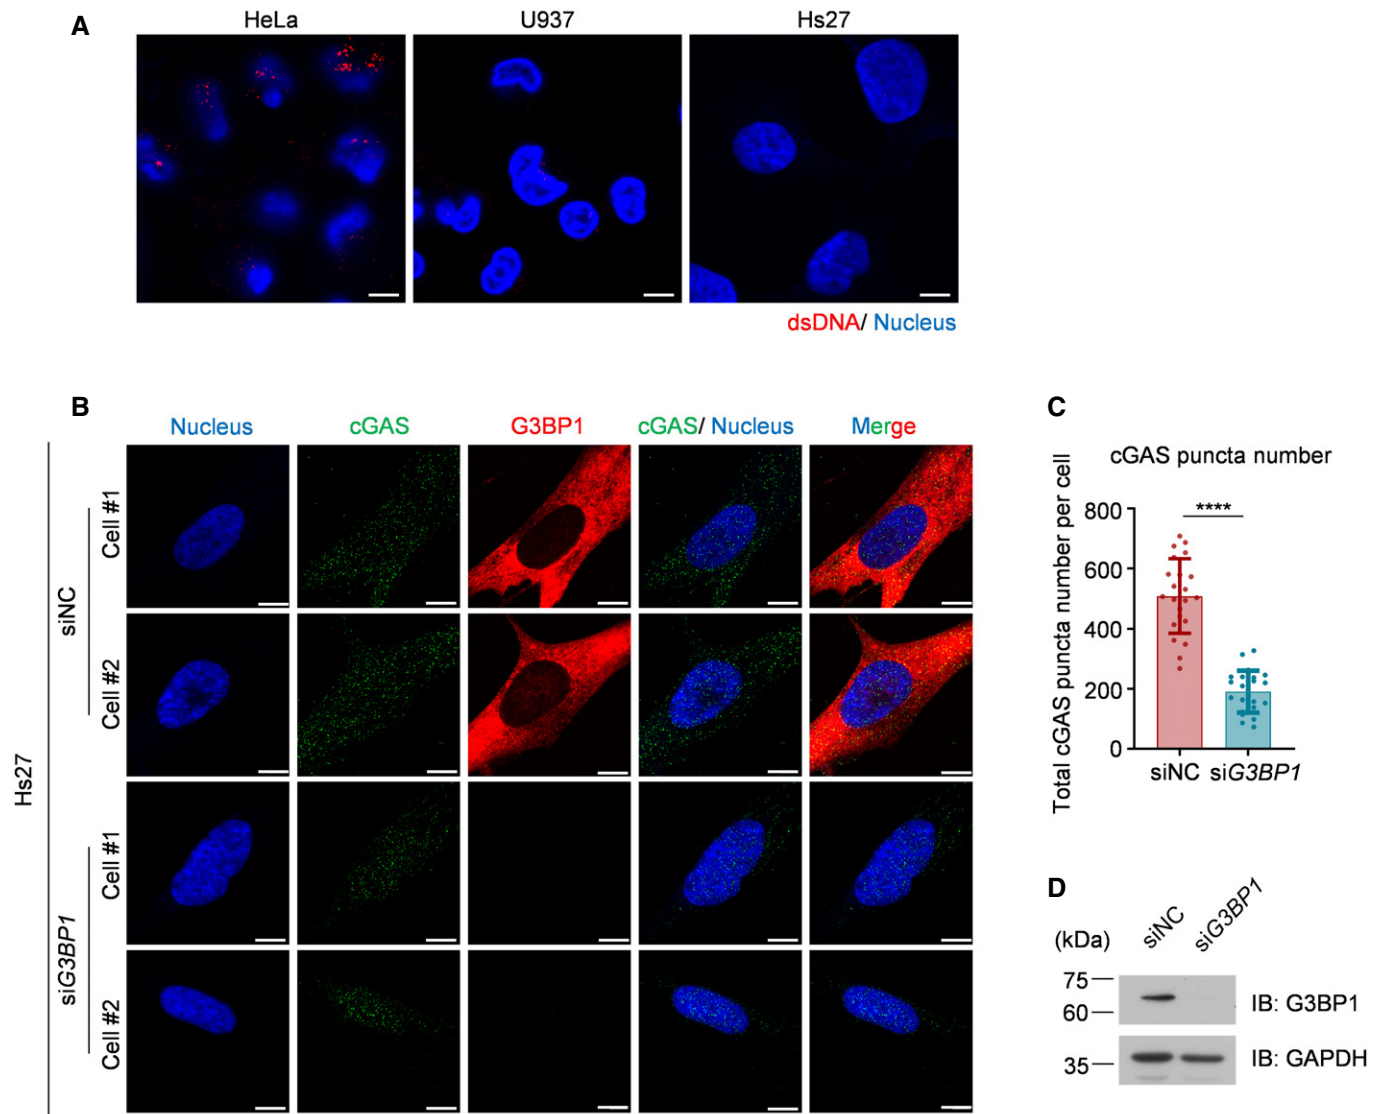

**Figure EV2. G3BP1 engages cGAS in a condensed state in human fibroblast cell line.**

A Immunofluorescent staining of cytosolic dsDNA in indicated cells.

B Immunofluorescent staining of cGAS in both WT and *G3BP1*-knockdown Hs27 cells.

C Quantitative analysis of total cGAS puncta number per cell in (B).  $n = 22$  cells. Error bar, mean with s.d. \*\*\*\* $P < 0.0001$ , two-tailed t-test.

D Knockdown effect of G3BP1 was analyzed by immunoblotting.

Data information: Representative images are shown (A, B and D). Scale bars, 5  $\mu$ m (A and B). Hoechst (blue), nuclear staining. WT, wild type; IB, immunoblotting; NC, negative control.

Source data are available online for this figure.

**Figure EV3. The engagement with DNA, but not with RNA, leads to the dissociation of G3BP1 from cGAS.**

- A Time-lapse imaging of a single cGAS-G3BP1 droplet (left). A quantitative analysis of the time course of the droplet fluorescence intensity is shown (right).  $n = 20$  condensates.
- B cGAS-G3BP1 interaction analysis. cGAS was precipitated with anti-cGAS antibodies in U937 cells treated with HT-DNA as indicated. IgG served as control. The cGAS-G3BP1 interaction was further analyzed with immunoblotting (IB).
- C Time-lapse imaging of a single cGAS-DNA droplet in the presence of G3BP1-mEGFP (left). A quantitative analysis of the time course of the droplet fluorescence intensity is shown (right).  $n = 20$  condensates.
- D Time-lapse imaging of a single droplet formed by cGAS, G3BP1, and dsRNA (left). A quantitative analysis of the time course of the droplet fluorescence intensity is shown (right).  $n = 20$  condensates.
- E cGAS, G3BP1, and Cy5-labeled ssRNA were incubated. Indicated concentrations of Cy5-labeled ssRNA were used.
- F Time-lapse imaging of condensates formed by cGAS, G3BP1, and ssRNA.
- G cGAS, G3BP1, and Cy5-ssRNA were incubated. A quantitative analysis of a representative cGAS-DNA condensate is shown. Along the white line on the merged image, the fluorescence intensity of G3BP1, cGAS, and ssRNA channels were recorded.
- H Time-lapse imaging of a single droplet formed by cGAS, G3BP1, and ssRNA (left). A quantitative analysis of the time course of the droplet fluorescence intensity is shown (right).  $n = 20$  condensates.

Data information: Representative images are shown (A, C–H). 45  $\mu\text{M}$  cGAS-mCherry, 10  $\mu\text{M}$  G3BP1-mEGFP, 2  $\mu\text{M}$  dsDNA, dsRNA ssRNA were used in the assays. Error bars, mean with s.d. (A, C, H) and s.e.m. (D). Scale bars, 0.28  $\mu\text{m}$  (A), 1  $\mu\text{m}$  (C, D and H), 10  $\mu\text{m}$  (E and F), 5  $\mu\text{m}$  (G).

Source data are available online for this figure.

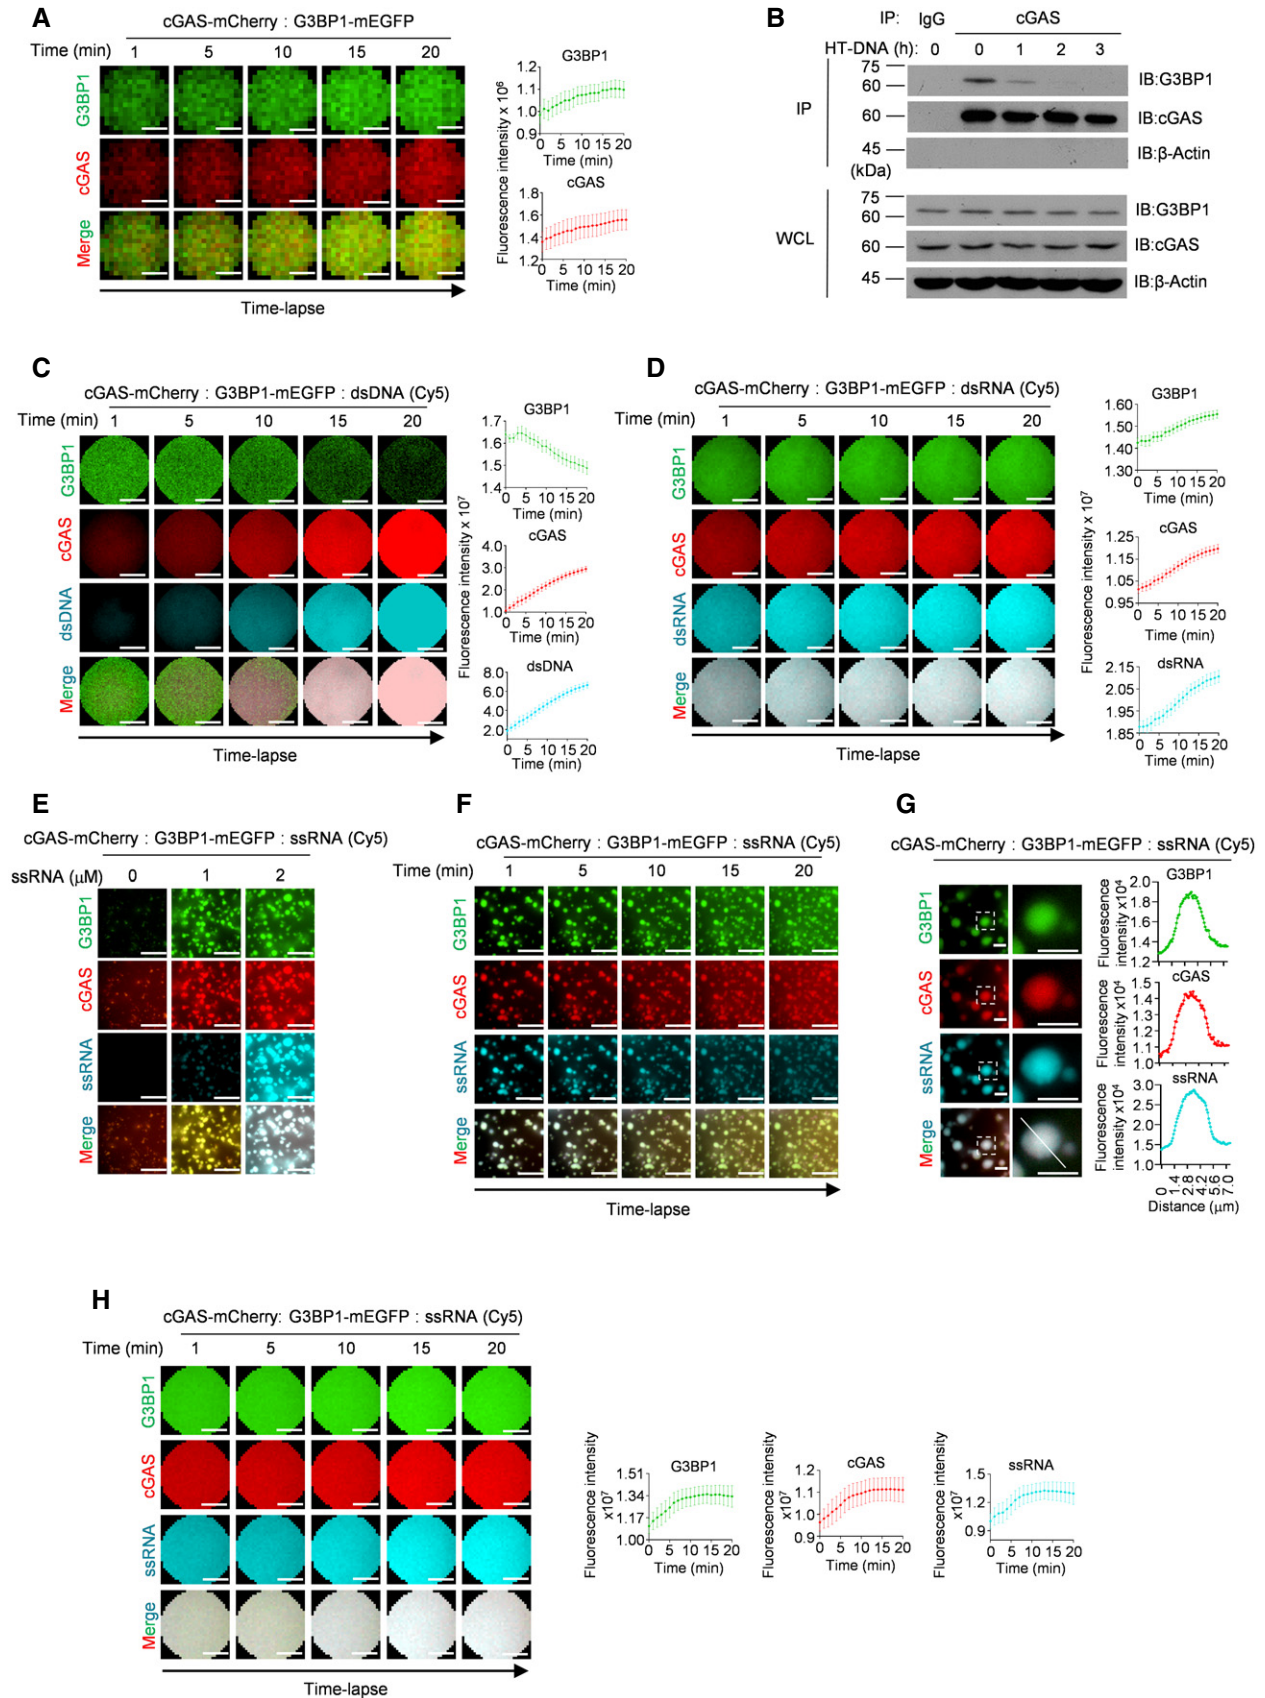

Figure EV3.

**Figure EV4. G3BP1 promotes DNA-induced LLPS and activation of cGAS.**

- A, B Time-lapse imaging of droplets formed by recombinant cGAS (10  $\mu$ M) and indicated amounts of Cy5-labeled dsDNA.
- C Quantitative analysis of (A).  $n = 3$  biological replicates.
- D Time-lapse imaging of cGAS-DNA droplets in the presence of the indicated amounts of G3BP1. 10  $\mu$ M cGAS and 200 nM Cy5-labeled dsDNA were used.
- E Quantitative analysis of (D).  $n = 3$  biological replicates.
- F Time-lapse imaging of cGAS-DNA condensates in the presence of heparin affinity chromatography purified G3BP1. 10  $\mu$ M cGAS and 500 nM Cy5-labeled dsDNA were used.
- G Quantitative analysis of (F).  $n = 3$  biological replicates.

Data information: Representative images are shown (A, B, D and F), scale bars, 10  $\mu$ m. Error bars, mean with s.d. of (C, E and G). The partition coefficient was calculated as the total fluorescence intensity of droplets/bulk fluorescence intensity of background (C, E and G).

Source data are available online for this figure.

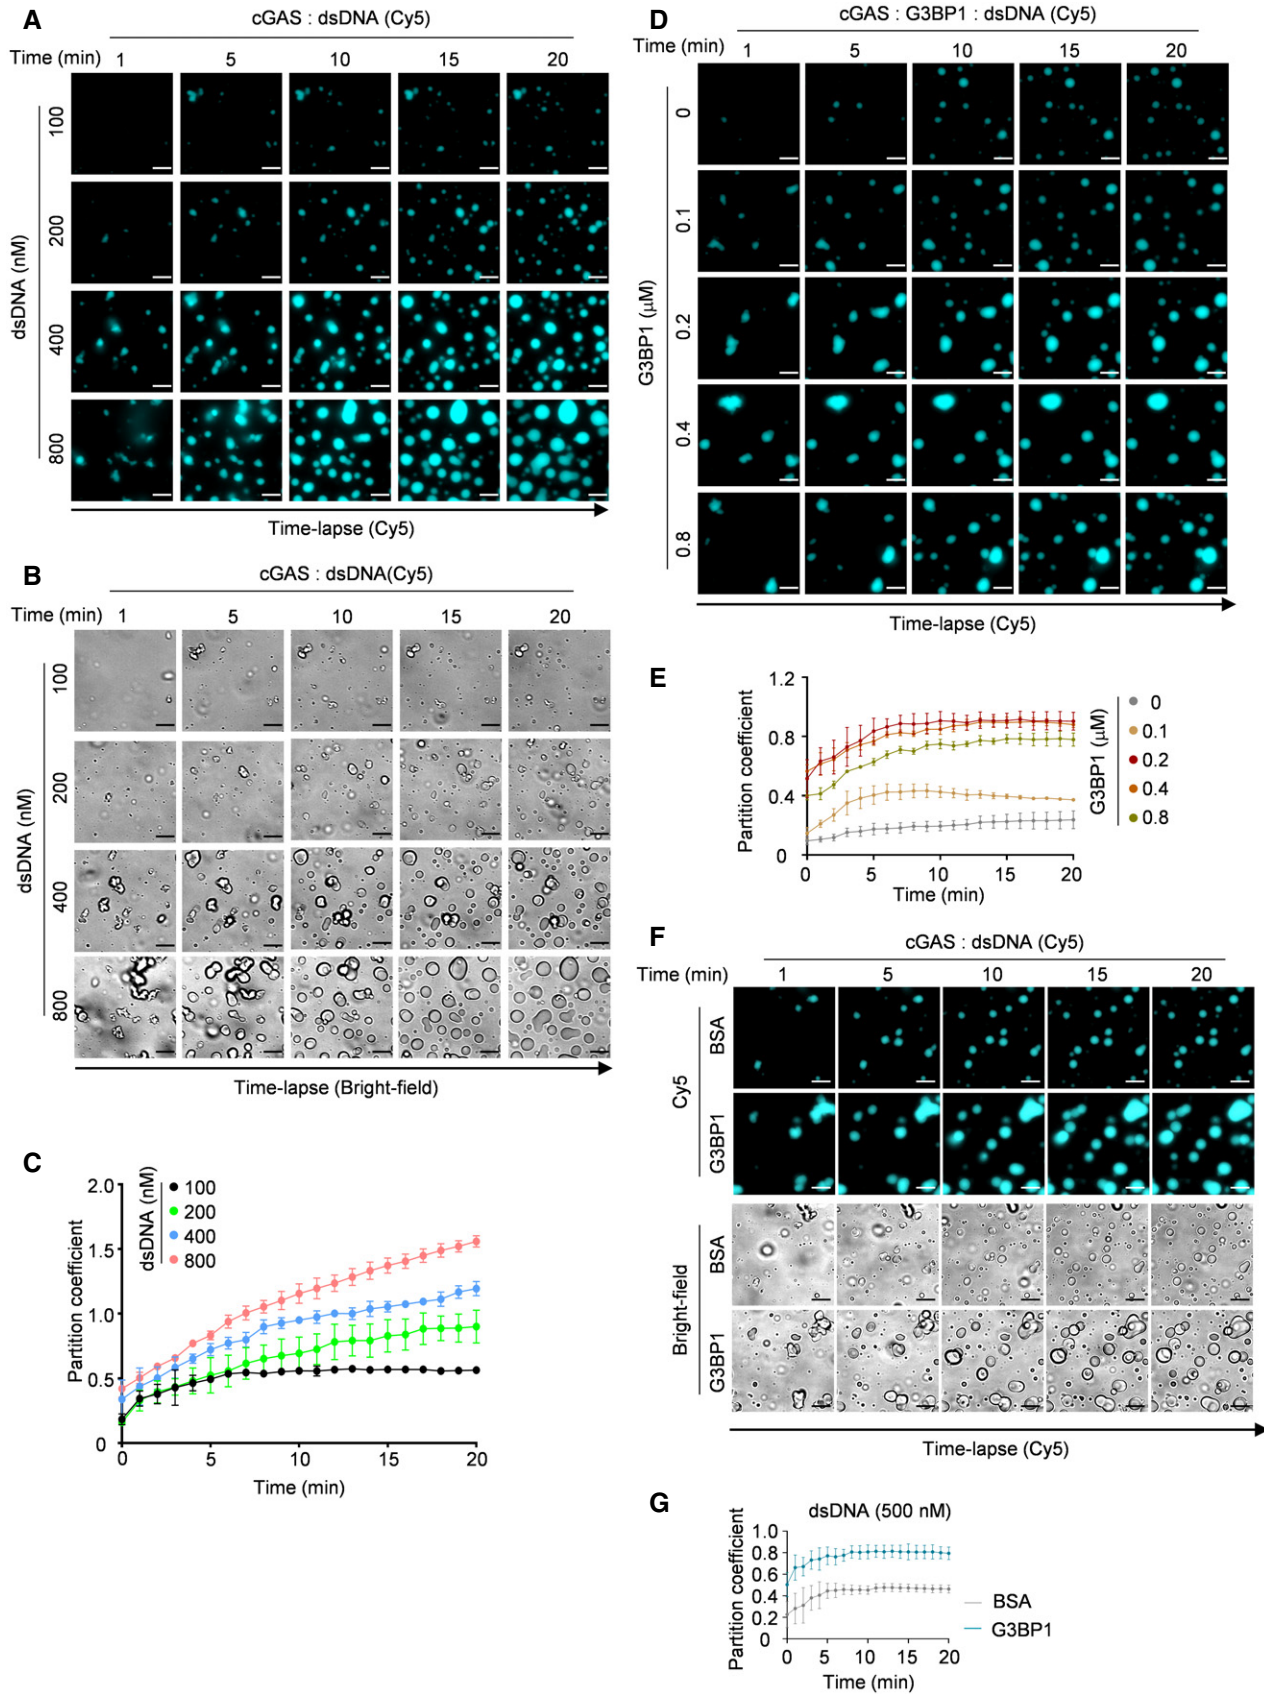

Figure EV4.

**Figure EV5. Full-length G3BP1 binds to cGAS and promotes LLPS of cGAS.**

- A Bright-field microscope images of Fig 5D.
- B Turbidity (top) and bright-field microscope images (bottom) of indicated groups. 10  $\mu$ M cGAS, 5  $\mu$ M full length or truncated G3BP1 were used in the assay.
- C Quantitative analysis of (B) (top) were measured by absorbance at 600 nm.  $n = 3$  biological replicates.
- D Quantitative analysis of total droplets area of (B) (bottom).  $n = 3$  biological replicates.

Data information: Representative images are shown (A, B), scale bars, 10  $\mu$ m. Error bars, mean with s.d. (C and D), \*\* $P < 0.05$ , \*\*\* $P < 0.001$ , two-tailed  $t$ -test. Source data are available online for this figure.



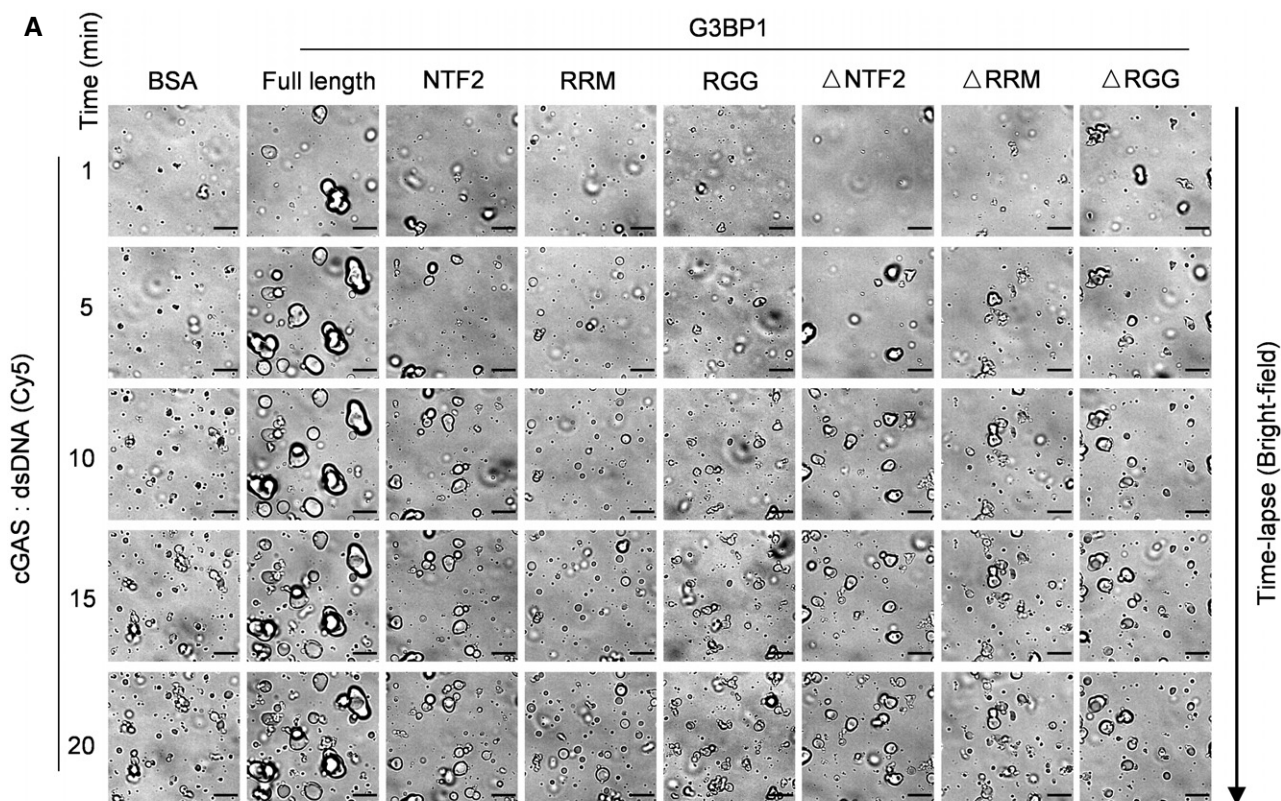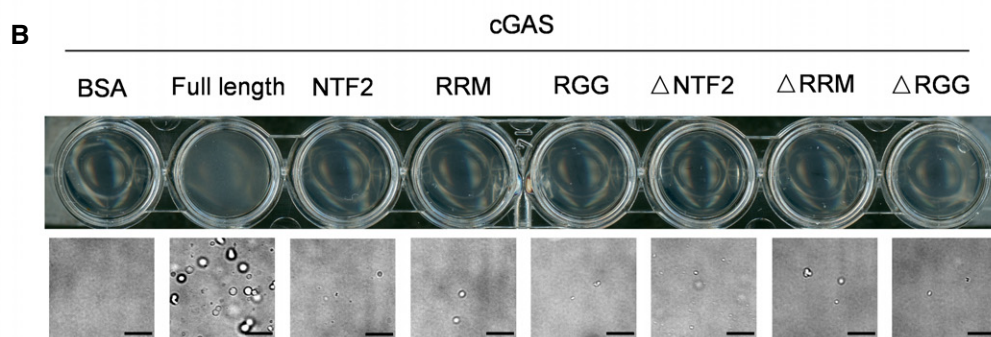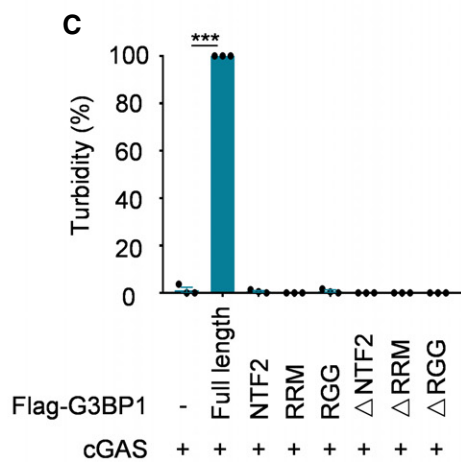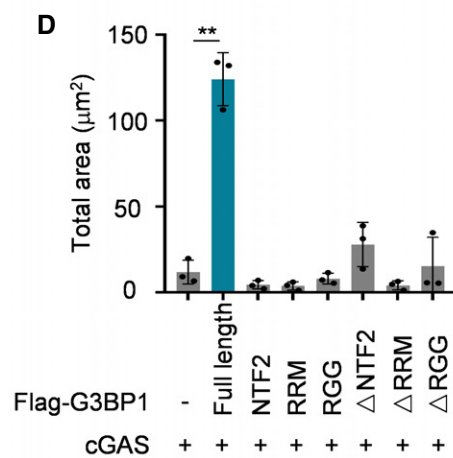

Figure EV5.
